# Supplementary material for: AHL26, an AT-hook gene, negatively regulates hypocotyl growth and flowering time in Arabidopsis thaliana
Source: Research Square preprint supplement (doi:10.21203/rs.3.rs-6264939/v1), 2025-04-22
Supplement: Supplementary file 1 [file 7124f35d36c5a49401d6eae2.docx]

**Supplementary Information**


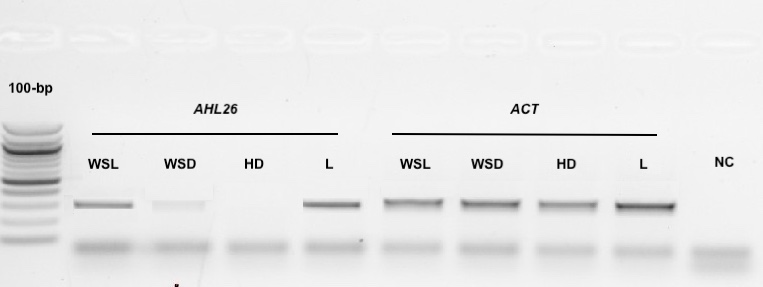


Figure S1**.** Semi-quantitative PCR showing AHL26 expression pattern in 8-day-old whole seedlings grown at 20 μmol m-2 s-1 continuous light (WSL), dark-grown 8-day-old whole seedlings (WSD), hypocotyls plus roots from 8-day-old dark-grown seedlings (HD), adult flowering plant rosette leaf (L). An actin (ACT) housekeeping gene was used as an internal control. A reaction without a reverse transcriptase treatment serves as a negative control (NC).


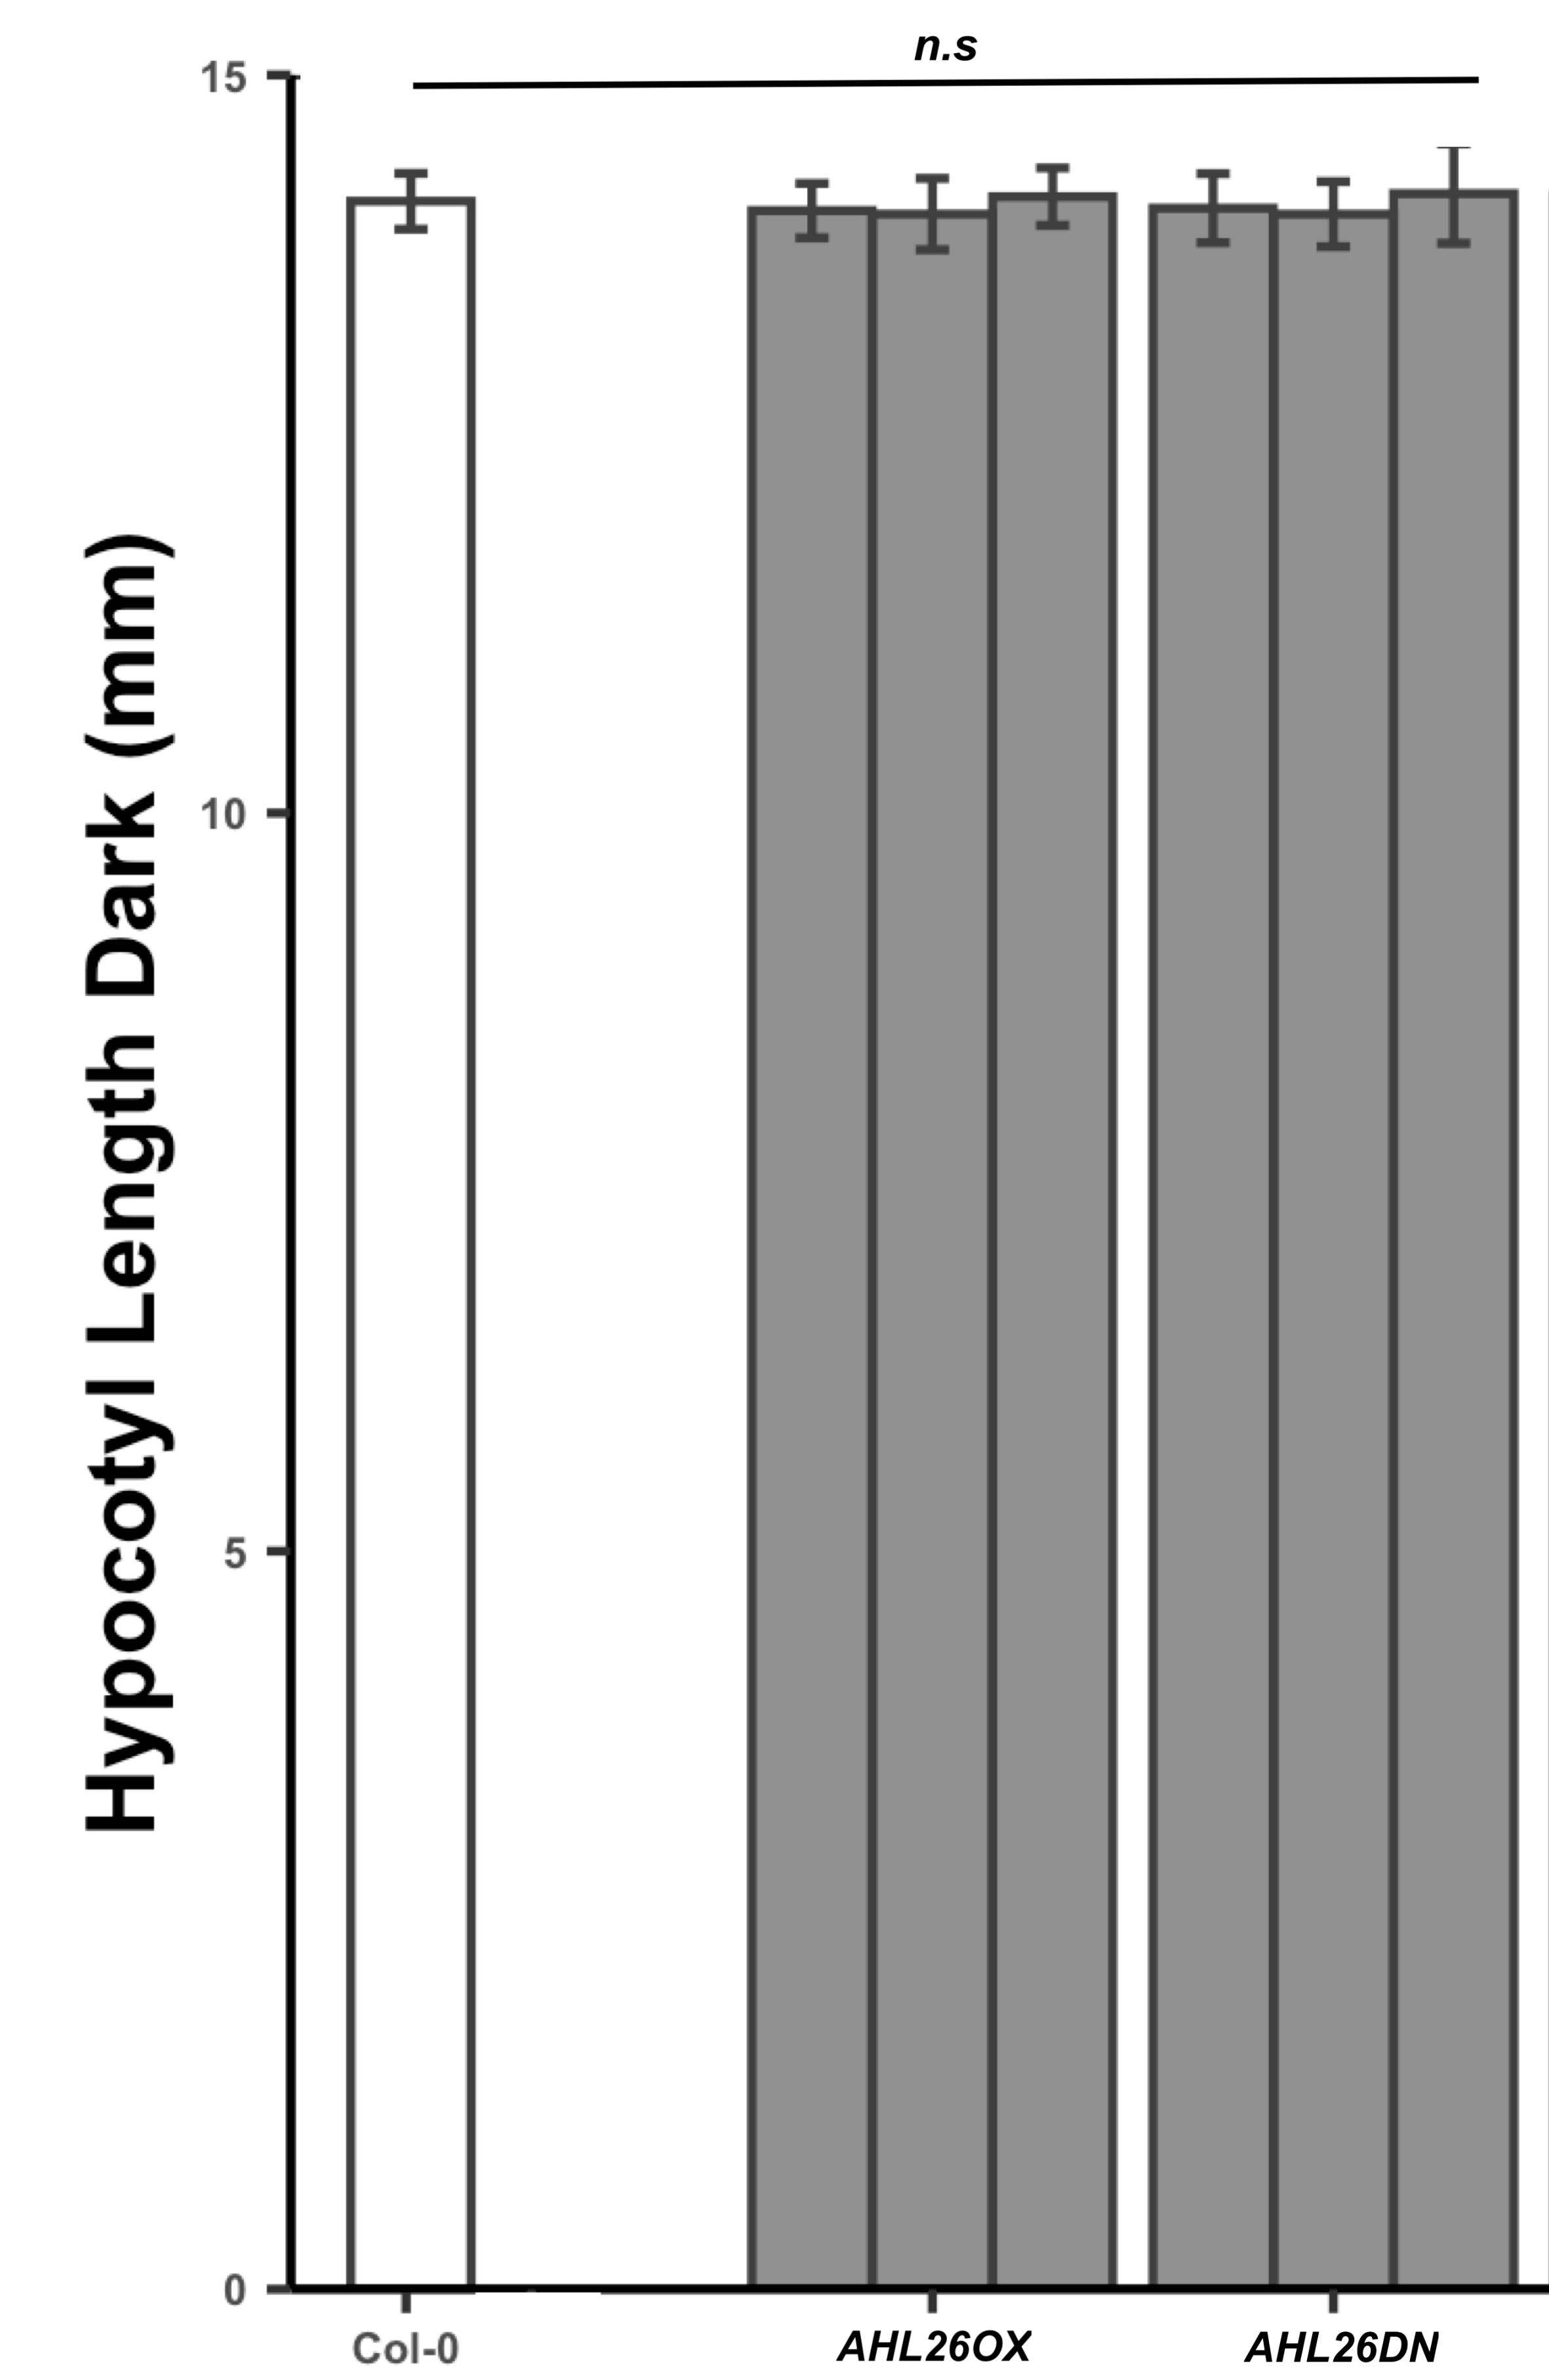


Figure S2. Quantitative analysis of hypocotyl lengths of 8 days old seedlings under dark conditions.Seeds were treated with red light for 4 hours after the four days of cold treatment. n ³ 20. The error bar donates the SEM.


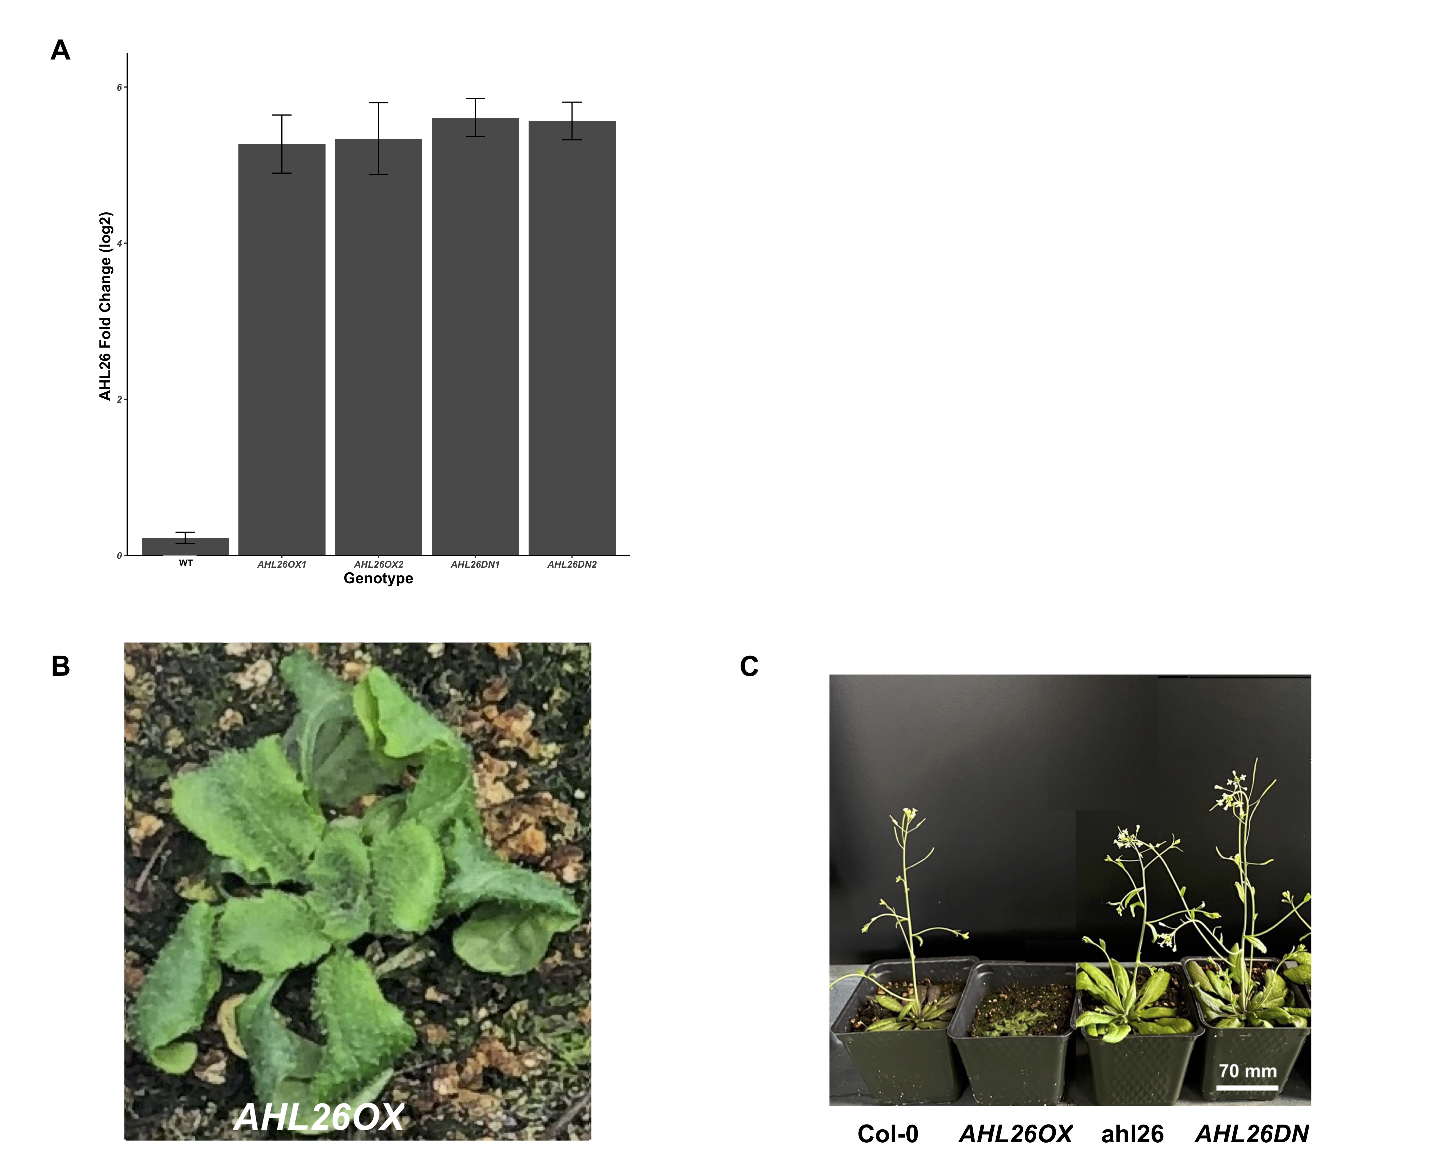


Figure S3. The effect of AHL26 overexpression on the plant phenotype. (A) mRNA expression level of AHL26 in overexpression, and dominant-negative mutants determined by quantitative real-time PCR. Error bars for (A) represent the standard deviation (n = 3). (B) The overexpression of AHL26 results in deformed leaves. (C) The phenotypic comparison of overexpression, and dominant-negative mutants at the flowering stage.

| Name | Sequence (5’-3’) | Description |
| --- | --- | --- |
| AHL 26-DN-F | AGGCCAAGAGGACACCCAGCAGGATCC | Dominant-negative mutants |
| AHL 26-DN-R | GGATCCTGCTGGGTGTCCTCTTGGCCT | Dominant-negative mutants |
| AHL26-RT-F2 | GGGTCCTGTGGTGGTTATGGCG | Gene expression analysis |
| AHL26-RT-R2 | CTGCTGATCATTCTGTTG | Gene expression analysis |
| AHL26-GUS-1F | CTAGTAGAATTCGTGAATTAATGTAACTCAATAGAGG | GUS fusion |
| AHL26-GUS-1R | GTACGTCCATGGGATACGGTGGCCGACCCG | GUS fusion |

Table S1. The sequence of primers used.The pair of primers used to generate constructs for the generation of transgenic material used in the study as well as for gene expression analysis.

| Category | Description | GeneRatio | pvalue | geneName | Count |
| --- | --- | --- | --- | --- | --- |
| MF | sequence-specific double-stranded DNA binding | 6/171 | 0.01751318 | -/AHL19/AHL2/-/FLC/HSFA6B | 6 |
| MF | AT DNA binding | 2/171 | 0.0232996 | AHL19/AHL2 | 2 |

Table S2. Downregulated molecular function GO terms in *AHL26DN* transgenic lines.
